# Supplementary material for: Phytochemical Profile and Antioxidant Properties of Bee-Collected Artichoke (Cynara scolymus) Pollen
Source: MDPI journal article supplement (doi:10.3390/antiox10071091), 2021-07-07
Supplement: s1 [file s1]

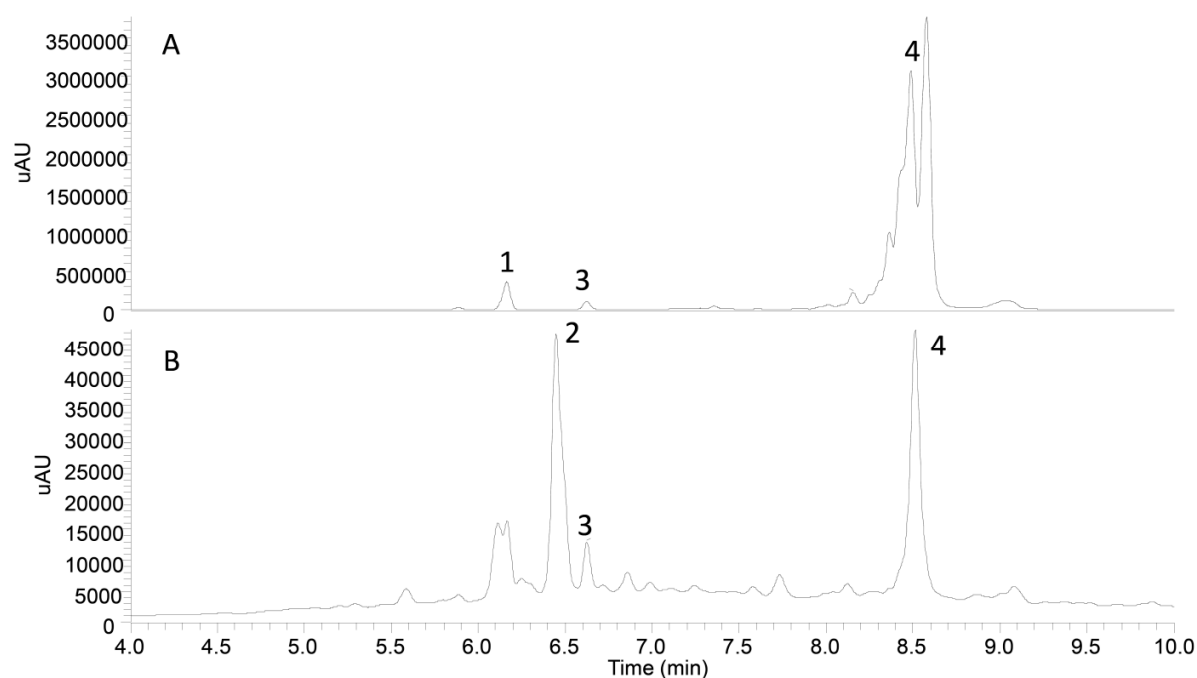

Figure S1. UV chromatograms at 280 nm with the main marked peaks of: (A) extractable phenolic fraction and (B) alkaline hydrolyzable phenolic fraction; Legend: 1 – Quercetin-3-*O*-glucoside, 2 – Kaempferol-3-*O*-glucoside; 3 – Isorhamnetin-3-*O*-glucoside, and 4 – Apigenin.

**Table S1.** MS data used for phenolic identification and quantification.

| Compounds                                       | Retention Time, min | Parent Ion, [M-H] <sup>-</sup> , <i>m/z</i> | Product Ions, [M-H] <sup>-</sup> , <i>m/z</i> (Collision Energy, eV) |
|-------------------------------------------------|---------------------|---------------------------------------------|----------------------------------------------------------------------|
| Caffeic acid                                    | 5.33                | 179.004                                     | 134.00 (13); 135.00 (16)                                             |
| Ferulic acid                                    | 6.54                | 193.057                                     | 134.00 (18); 178.00 (15)                                             |
| Isoquercetin (Quercetin-3- <i>O</i> -glucoside) | 6.19                | 463.002                                     | 271.01 (44); 300.02 (29)                                             |
| Rutin                                           | 6.03                | 609.197                                     | 299.98 (42); 301.20 (32)                                             |
| Isorhamnetin-3- <i>O</i> -glucoside             | 6.63                | 477.009                                     | 314.02 (28); 314.98 (36)                                             |
| Kaempferol                                      | 8.80                | 285.074                                     | 211.00 (32); 227.00 (32)                                             |
| Astragalin (Kaempferol-3- <i>O</i> -glucoside)  | 6.55                | 447.088                                     | 257.03 (40); 285.03 (30)                                             |
| Apigenin                                        | 8.53                | 269.032                                     | 117.24 (43); 149.00 (24)                                             |
| Apigetrin (Apigenin-7- <i>O</i> -glucoside)     | 6.68                | 431.004                                     | 239.11 (53); 268.03 (36)                                             |
| Aesculetin                                      | 5.30                | 176.911                                     | 133.08 (21); 153.00 (20)                                             |
